# Supplementary material
Source: publisher site journal article supplement (https://www.dovepress.com/article/330368)
Supplement: Supplementary file 1 [file get_supplementary_file.php]

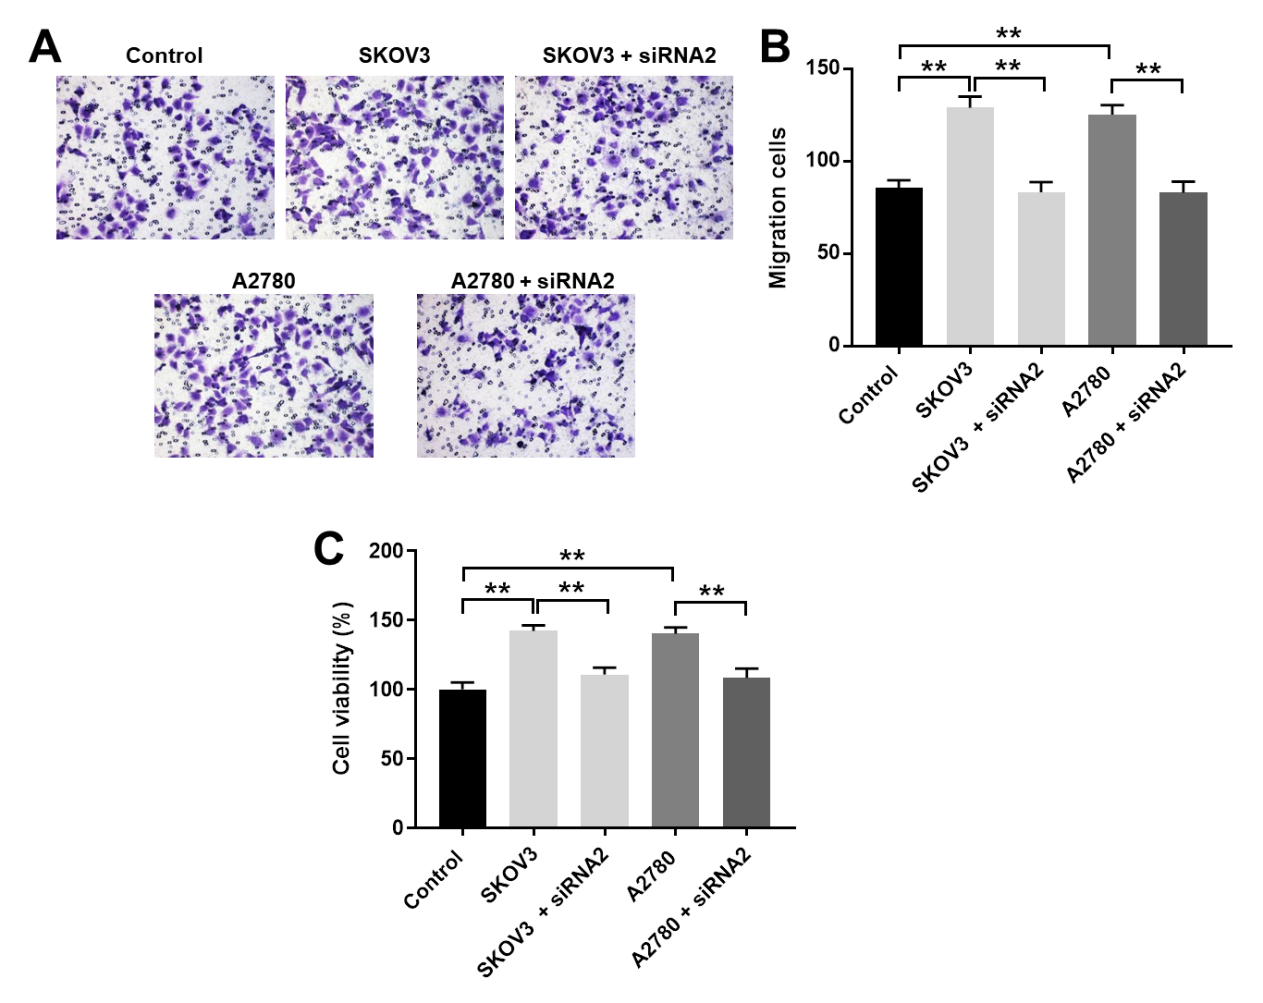


**Supplementary Figure 1 Co-culture of ovarian cancer cells and HUVECs.** The ovarian cancer cells (SKOV3 and A2780) were co-cultured with HUVECs for 48 h. (A, B) Transwell assay was performed to detect the migration of HUVECs. (C) CCK8 experiment was conducted to measure the viability of HUVECs. **P < 0.01 compared with control group; n = 3.
